# Supplementary figures and images for: Glycemic indices of five varieties of dates in healthy and diabetic subjects
Source: Springer Nature journal article supplement (doi:10.1186/1475-2891-10-59), 2011-05-28

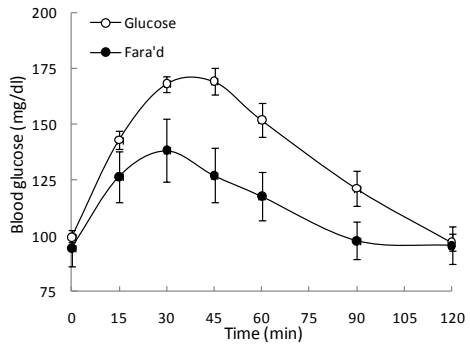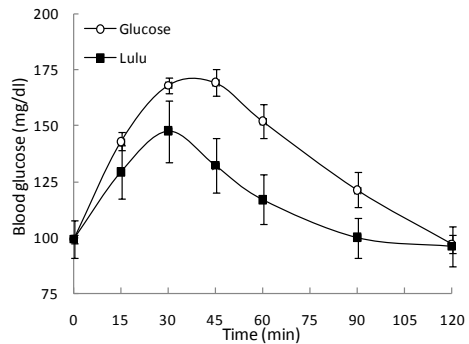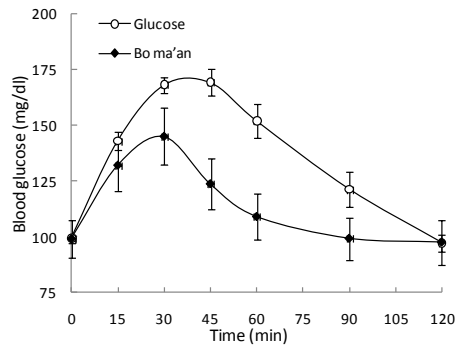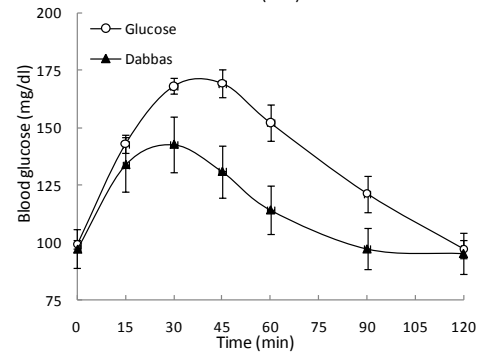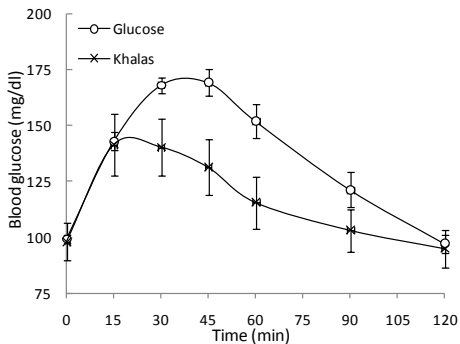

Supplement: 12937_2010_370_MOESM2_ESM.pdf [file 12937_2010_370_MOESM2_ESM.pdf]

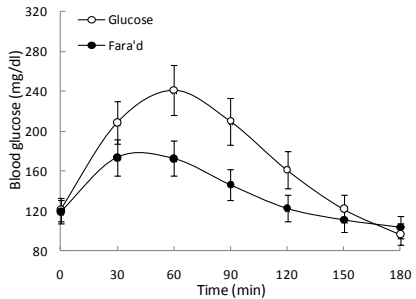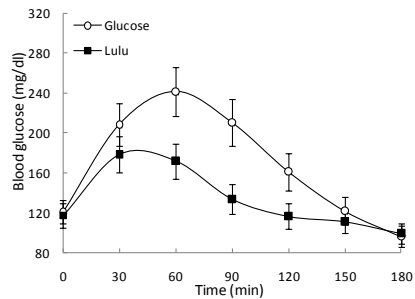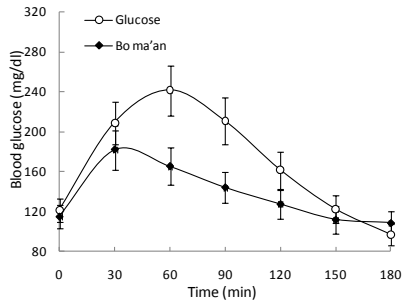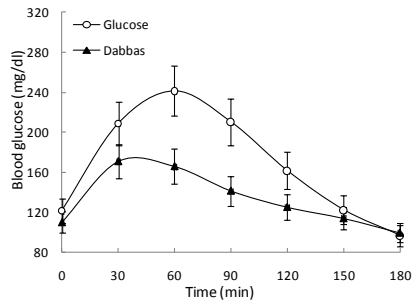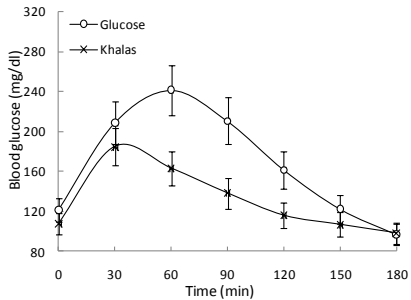

Supplement: 12937_2010_370_MOESM3_ESM.pdf [file 12937_2010_370_MOESM3_ESM.pdf]
